# Supplementary material for: Unravelling structure–function interactions between fluorinated heparan sulfate mimetics and signaling proteins
Source: RSC Chem Biol. 2025 Jul 10;6(9):1465–72. doi: 10.1039/d5cb00174a (PMC12311619; doi:10.1039/d5cb00174a)
Supplement: CB-006-D5CB00174A-s001 [file CB-006-D5CB00174A-s001.xlsx]

## Sheet: Array ranked data
		Title:
		Glass slide:	PolyAn 2D Epoxy covered Slides (104-00-221)
		Primary binding:	As listed in table
		Primary binding dilution:	As listed in table
		Primary binding volume:	100µl
		Secondary AB:	As listed in table
		Secondary AB Concentration:	As listed in table
		Secondary AB volume:	100µl
		Final detection:	As listed in table
		Final detection Concentration:	As listed in table
		Final detection volume:	200µl
		Scanned by	Genepix 4000B (molecular devices) at PMT 350 for Cy3 and 600PMT for Alexa 647
		buffer used:
		Chemical blocking	0.1M Tris pH 9 + 0.05M Ethanolamine
		Biological blocking	PBS pH 7.3 + 1% w/v Ovalbumin
		Wash buffer:	PBS + 0.1% Tween 20
		Primary buffer:	PBS pH 7.3 + 1% w/v Ovalbumin
		Secondary and final buffer:	PBS pH 7.3
		Primary detection	Human FGF1 (acidic)		Human FGF2 (basic recombinant)		Human VEGF-165		Human HB-EGF		Human Amphiregulin		Human BMP2		Human MCP-4 (CCL13)		Human SD1α (CXCL12)		Human IP-10 (CXCL10)		Human MCP-3 (CCL7)		Human MCP-1/MCAF (CCL2)		Human RANTES (CCL5)		Human MEC (CCL28)		Human BCA-1 (CXCL13)		Human Exodus-2 (CCL21)
		Primary detection dilutions	10, 3.3, 1.3 µg/ml		10, 3.3, 1.3 µg/ml		10, 3.3, 1.3 µg/ml		10, 3.3, 1.3 µg/ml		10, 3.3, 1.3 µg/ml		10, 3.3, 1.3 µg/ml		10, 3.3, 1.3 µg/ml		10, 3.3, 1.3 µg/ml		10, 3.3, 1.3 µg/ml		10, 3.3, 1.3 µg/ml		10, 3.3, 1.3 µg/ml		10, 3.3, 1.3 µg/ml		10, 3.3, 1.3 µg/ml		10, 3.3, 1.3 µg/ml		10, 3.3, 1.3 µg/ml
		Primary detection buffer	PBS pH 7.3 + 1% w/v Ovalbumin		PBS pH 7.3 + 1% w/v Ovalbumin		PBS pH 7.3 + 1% w/v Ovalbumin		PBS pH 7.3 + 1% w/v Ovalbumin		PBS pH 7.3 + 1% w/v Ovalbumin		PBS pH 7.3 + 1% w/v Ovalbumin		PBS pH 7.3 + 1% w/v Ovalbumin		PBS pH 7.3 + 1% w/v Ovalbumin		PBS pH 7.3 + 1% w/v Ovalbumin		PBS pH 7.3 + 1% w/v Ovalbumin		PBS pH 7.3 + 1% w/v Ovalbumin		PBS pH 7.3 + 1% w/v Ovalbumin		PBS pH 7.3 + 1% w/v Ovalbumin		PBS pH 7.3 + 1% w/v Ovalbumin		PBS pH 7.3 + 1% w/v Ovalbumin
		2' antibody	Biotinylated-Rabbit αHuman FGF acidic		Biotinylated-Rabbit-FGF2 polyclonal antibody		Biotinylated-Rabbit αHuman VEGF-165		Biotinylated-Rabbit αHuman HB-EGF		Biotinylated-Rabbit αHuman Amphiregulin		Human BMP-2 Detection Antibody		Biotinylated Anti-H-MCP-4		Biotinilated Antigen Affinity Purified G-Anti Murin SDF-1α		Biotinylated Anti-Human		Biotinylated Anti-Human		Biotinylated Anti-Human		Biotinylated Rabbit Anti-Rantes (CCL5)		Biotinylated Anti-Human MEC		Biotinylated Anti-Human		Biotinylated-Rabbit αHuman Exodus-2 (CCL21)
		2' antibody dilution	1 µg/ml		1 µg/ml		1 µg/ml		1 µg/ml		1 µg/ml		1 µg/ml		1 µg/ml		1 µg/ml		1 µg/ml		1 µg/ml		1 µg/ml		1 µg/ml		1 µg/ml		1 µg/ml		1 µg/ml
		Final antibody	Cy3-SA,		Cy3-SA,		Cy3-SA,		Cy3-SA,		Cy3-SA,		Alexa 647 anti Rabbit, 5µg/ml		Cy3-SA,		Cy3-SA,		Cy3-SA,		Cy3-SA,		Cy3-SA,		Cy3-SA,		Cy3-SA,		Cy3-SA,		Cy3-SA,
		Final antibody dilution	1.5µg/ml		1.5µg/ml		1.5µg/ml		1.5µg/ml		1.5µg/ml		5µg/ml		1.5µg/ml		1.5µg/ml		1.5µg/ml		1.5µg/ml		1.5µg/ml		1.5µg/ml		1.5µg/ml		1.5µg/ml		0.1 g/ml
		No of blocks averaged	3		3		3		3		3		3		3		3		3		3		3		3		3		3		3
HD	ID	Glycan Structure	MEAN RANK	SEM	MEAN RANK	SEM	MEAN RANK	SEM	MEAN RANK	SEM	MEAN RANK	SEM	MEAN RANK	SEM	MEAN RANK	SEM	MEAN RANK	SEM	MEAN RANK	SEM	MEAN RANK	SEM	MEAN RANK	SEM	MEAN RANK	SEM	MEAN RANK	SEM	MEAN RANK	SEM	MEAN RANK	SEM
HD-1	832	GlcNAcα4GlcβO(CH2)2CH2NH2	0.0691342	0.0684269	1.73188	0.675284	0.109792	0.109464	3.56864	0.474405	3.85771	1.32617	2.28655	0.875623	1.22473	0.552628	0.624424	0.421538	1.91232	0.738907	0.0752645	0.0742841	0.258141	0.189264	0.052391	0.051349	0.121813	0.120837	3.10858	1.80798	0.00193664	0.000226519
HD-2	835	GlcNAc(6S)α4GlcAβO(CH2)2CH2NH2	0.185737	0.103945	47.7719	10.5675	26.1976	7.29078	47.1163	4.76807	30.3119	10.7375	31.9991	10.4238	50.1022	9.069	51.0372	8.97663	46.7992	7.27323	36.7048	3.87774	16.1045	8.97886	22.4208	10.2364	19.71	7.51804	6.12144	2.55913	62.0335	10.3866
HD-3	836	GlcNAc(3S)α4GlcAβO(CH2)2CH2NH2	0.0473015	0.0465942	35.1449	7.74048	22.8837	8.3702	20.1879	6.25678	34.7518	6.74947	20.7817	5.00893	44.7239	5.76104	43.0506	8.57109	39.2189	7.57536	31.0054	4.55837	21.1174	5.34128	29.1211	8.15777	15.6566	6.75965	0.866038	0.322014	54.3603	6.70824
HD-4	841	GlcNS(6S)α4GlcAβO(CH2)2CH2NH2	2.34101	0.69452	70.4303	1.80215	47.9844	4.95037	61.0282	2.92304	60.2534	8.14184	55.203	4.77675	55.889	3.01123	54.1681	7.80572	60.217	10.4399	49.1303	8.11896	45.0707	6.71255	35.5465	3.23585	29.5941	11.8848	7.10711	0.942085	50.7715	9.20601
HD-5	842	GlcNS(3S)α4GlcAβO(CH2)2CH2NH2	6.61792	1.50041	78.9033	2.75973	58.7957	3.12033	69.812	6.53625	49.0594	3.12642	61.0199	5.8573	65.341	4.05708	54.36	7.81354	51.8497	7.16974	43.0936	5.69614	45.9247	7.95675	46.9326	7.0509	19.1706	7.75503	8.67305	0.766584	51.2597	10.2911
HD-6	868	GlcNS(6S,3S)α4GlcAβO(CH2)2CH2NH2	13.0511	2.01872	77.0029	4.20478	57.2192	7.55635	54.2052	4.9727	60.823	5.07675	53.8968	3.40256	65.4875	4.43364	55.5099	5.04365	61.6814	4.3196	62.4647	5.08917	58.8975	7.19083	53.6841	2.88588	41.1491	2.51303	16.6876	1.70597	38.067	11.7334
HD-7	869	GlcNS(6S,3S)α4GlcA(2S)βO(CH2)2CH2NH2	18.6203	2.21536	69.8047	4.37897	52.6812	7.37632	46.6446	4.83204	51.4661	7.75175	48.0589	2.09525	69.0052	3.926	53.1302	4.95739	54.1712	5.20215	55.5797	6.69456	60.3396	7.14206	60.5758	3.83784	34.6362	6.68477	28.3421	1.901	30.8156	11.2489
HD-8	831	GlcNAcα4IdoAαO(CH2)2CH2NH2	0.0664432	0.0588998	24.0665	4.2045	20.3014	4.60728	6.82876	1.39088	33.8299	12.2325	18.915	2.95227	27.3779	2.86907	18.5791	3.04311	26.9668	4.47736	14.1959	1.07416	10.0182	3.24634	13.1475	6.15794	27.1055	7.29495	2.86874	0.981323	10.0156	2.71757
HD-9	833	GlcNAc(6S)α4IdoAαO(CH2)2CH2NH2	0.216892	0.185317	41.3823	11.0763	34.5137	2.78511	30.7184	9.77779	35.1257	13.6589	26.2151	6.35899	45.4146	5.69139	46.2854	8.88257	31.0936	9.03831	29.5923	6.02775	11.3176	5.54441	18.6811	8.02395	9.69153	6.61039	2.71318	1.06895	39.147	6.97906
HD-10	834	GlcNAc(3S)α4IdoAαO(CH2)2CH2NH2	0.0603504	0.053953	41.0262	10.6037	28.362	5.92789	25.8173	7.43498	28.8133	11.3676	31.84	9.38387	48.2806	6.84359	46.2296	6.74248	61.6956	9.63092	46.4703	4.32569	19.003	10.5561	15.8303	7.5945	28.8579	10.1237	3.69027	1.29203	39.1475	12.8696
HD-11	839	GlcNS(6S)α4IdoAαO(CH2)2CH2NH2	0.704052	0.216967	70.2255	4.6461	34.749	6.81021	56.4248	12.7374	46.0949	10.1658	58.032	10.3948	54.4877	7.93744	57.8342	8.80804	45.5254	8.27315	49.6161	3.44665	18.7042	7.86516	38.9552	10.2508	17.1261	5.41655	2.8455	0.777021	55.4168	9.93384
HD-12	840	GlcNS(3S)α4IdoAαO(CH2)2CH2NH2	0.856799	0.547289	61.2908	2.64114	30.4387	4.93461	29.7901	9.55539	59.2708	6.34182	45.8625	5.52129	41.6333	5.88916	46.5848	8.1909	49.0012	2.25056	37.4547	5.31425	16.4097	6.71649	34.0977	10.6561	8.18862	4.63674	3.63312	0.390593	39.7662	10.4018
HD-13	846	GlcNS(6S)α4IdoA(2S)αO(CH2)2CH2NH2	90.3421	5.6109	81.963	6.32904	90.2964	5.25026	91.035	5.50908	73.2095	9.21374	71.2798	2.16597	90.895	3.7883	83.6222	5.87093	55.7181	11.03	74.7571	10.8759	74.2685	10.7416	65.4165	4.44143	64.1603	16.7082	94.8172	3.16303	42.6537	12.5365
HD-14	847	GlcNS(6S,3S)α4IdoA(2S)αO(CH2)2CH2NH2	29.6998	4.7913	84.5893	6.92132	86.5914	4.56864	65.9972	8.58229	65.3501	8.44123	83.3407	4.94467	80.0912	4.07279	68.921	6.0661	87.6081	6.52191	76.6368	3.26349	77.215	3.27692	59.7688	3.3734	56.2453	10.6704	50.6094	5.84329	39.1666	8.28833
HDF-1	849	GlcNAcα4GlcA(3F)βO(CH2)2CH2NH2	0.00074177	8.55264e-05	9.59083	2.90809	0.000312831	2.45112e-05	6.78243	1.26335	13.7652	1.52818	2.29065	1.08065	12.4431	2.4687	1.76364	0.894282	3.61472	1.8232	0.472699	0.404968	0.464307	0.185379	1.00102	0.844155	2.23448	2.23351	0.00378145	0.000704434	0.289076	0.287084
HFD-2	850	GlcNAc(6S)α4GlcA(3F)βO(CH2)2CH2NH2	0.788636	0.363173	84.2326	1.93043	53.0223	5.87515	71.9557	7.71639	60.0405	10.0348	83.4165	6.98279	72.4599	3.37964	61.3533	11.9368	75.1651	9.09903	66.2766	3.0796	51.3504	10.7989	35.4532	5.88883	40.8084	12.3587	4.75403	1.25143	75.7259	13.9159
HDF-3	851	GlcNAc(3S)α4GlcA(3F)βO(CH2)2CH2NH2	0.173769	0.109534	73.5453	4.84739	45.0199	9.23219	48.3349	15.7023	58.8705	7.88534	73.4236	5.53948	71.9577	3.61604	49.9062	7.27638	34.4241	6.9846	31.8884	4.29676	36.5681	6.92904	34.3645	6.46518	18.8981	5.1161	4.99809	0.875255	34.0844	9.66628
HDF-4	854	GlcNAc(6S,3S)α4GlcA(2S,3F)βO(CH2)2CH2NH2	19.673	2.8381	80.8218	2.31368	64.7649	6.25615	70.0451	1.3191	54.026	6.32244	63.4409	2.41022	73.7243	4.89021	67.0627	6.74592	80.6316	6.08582	68.677	4.99025	76.8901	5.70996	55.3856	2.65364	43.287	6.14315	48.2649	6.09883	34.086	9.36887
HDF-5	852	GlcNS(6S)α4GlcA(3F)βO(CH2)2CH2NH2	5.3924	1.30526	76.2756	3.66773	66.3302	3.15606	67.903	4.94587	43.3278	7.869	66.277	4.16921	66.18	3.29388	47.0835	4.97396	61.1489	6.93401	60.7261	7.55328	60.8763	6.46624	47.2136	3.78397	34.0332	5.97918	11.4207	1.54951	34.4555	7.77903
HDF-6	853	GlcNS(6S,3S)α4GlcA(3F)βO(CH2)2CH2NH2	23.037	2.88605	83.6718	4.92685	60.344	5.3093	64.2929	1.1816	39.6892	10.5372	63.7469	4.68966	62.3225	6.07745	65.1475	3.84725	44.6925	2.85023	40.28	10.155	69.1082	5.82073	60.7017	3.99868	25.494	4.04391	30.2812	4.67358	28.1256	8.44992
HDF-7	855	GlcNS(6S,3S)α4GlcA(2S,3F)βO(CH2)2CH2NH2	3.12691	0.687283	72.4108	3.14128	58.0548	4.02767	56.0291	3.04745	69.8578	11.6226	65.2268	6.52298	71.3908	4.76725	52.1398	6.75599	67.5684	3.75885	52.2272	8.11945	62.0201	5.20512	36.5129	3.35556	32.5495	9.74117	10.9554	1.95833	53.0372	14.5486
Natural Heparin	1547	Heparin	48.0609	6.45663	34.3225	5.07774	22.3314	10.1259	4.61157	2.66949	18.8454	11.4182	13.0783	6.11671	26.7723	7.88967	29.4843	7.56441	59.095	16.1235	71.9266	14.2856	32.4044	6.76763	64.7875	7.00029	15.4287	12.6858	65.0845	5.61466	66.0548	8.30442
