# Supplementary material for: Unravelling structure–function interactions between fluorinated heparan sulfate mimetics and signaling proteins
Source: RSC Chem Biol. 2025 Jul 10;6(9):1465–72. doi: 10.1039/d5cb00174a (PMC12311619; doi:10.1039/d5cb00174a)
Supplement: CB-006-D5CB00174A-s002 [file CB-006-D5CB00174A-s002.xlsx]

## Sheet: Detections details
	Protein	Catalog number	Concentration used µg/ml		2nd detecting Antibody, 1µg/ml	Catalog number		Final detection	Cat No
	Human FGF1 (acidic)	100-17A Peprotech	10, 3.3, 1.3		Biotinylated-Rabbit αHuman FGF acidic	500-P17BT Peprotech		Cy3-SA, 1.5µg/ml	Jackson Immunoresearch 016-160-0848
	Human FGF2 (basic recombinant)	100-18B Peprotech	10, 3.3, 1.3		Biotinylated-Rabbit-FGF2 polyclonal antibody	500-P18BT Peprotech		Cy3-SA, 1.5µg/ml	Jackson Immunoresearch 016-160-0848
	Human VEGF-165	AF-100-20 Peprotech	10, 3.3, 1.3		Biotinylated-Rabbit αHuman VEGF-165	500-P10BT Peprotech		Cy3-SA, 1.5µg/ml	Jackson Immunoresearch 016-160-0848
	Human HB-EGF	100-47 Peprotech	10, 3.3, 1.3		Biotinylated-Rabbit αHuman HB-EGF	500-P329BT Peprotech		Cy3-SA, 1.5µg/ml	Jackson Immunoresearch 016-160-0848
	Human Amphiregulin	100-55B Peprotech	10, 3.3, 1.3		Biotinylated-Rabbit αHuman Amphiregulin	500-P322BT Peprotech		Cy3-SA, 1.5µg/ml	Jackson Immunoresearch 016-160-0848
	Human BMP2	AF-120-02 Peprotech	10, 3.3, 1.3		Human BMP-2 Detection Antibody	500-P195BT Peprotech		Alexa 647 anti Rabbit IgG (H+L), 5µg/ml	Jackson Immunoresearch 711-605-152
	Human EGF	AF-100-15 Peprotech	10, 3.3, 1.3		Biotinylated-Rabbit αHuman EGF	500-P45BT Peprotech		Cy3-SA, 1.5µg/ml	Jackson Immunoresearch 016-160-0848
	Human MCP-4 (CCL13)	300-24-20 Peprotech	10, 3.3, 1.3		Biotinylated Anti-H-MCP-4	500-P04BT-25		Cy3-SA, 1.5µg/ml	Jackson Immunoresearch 016-160-0848
	Human IP-10 (CXCL10)	300-12-5 Peprotech	10, 3.3, 1.3		Rabbit Biotinylated Anti-Human IP-10	500-P93BT-25		Cy3-SA, 1.5µg/ml	Jackson Immunoresearch 016-160-0848
	Human MCP-3 (CCL7)	300-17-10 Peprotech	10, 3.3, 1.3		Goat Biotinylated Anti-Human MCP-3 (CCL7)	500-P37Gbt-25 Peprotech		Cy3-SA, 1.5µg/ml	Jackson Immunoresearch 016-160-0848
	Human MCP-1/MCAF (CCL2)	300-04 Peprotech	10, 3.3, 1.3		Rabbit Biotinylated Anti-Human MCAF/MCP-1 (CCL2)	500-P34BT Peprotech		Cy3-SA, 1.5µg/ml	Jackson Immunoresearch 016-160-0848
	Human SD1α (CXCL12)	300-28A Peprotech	10, 3.3, 1.3		Biotinilated Antigen Affinity Purified G-Anti Murin SDF-1α	500-P164G Peprotech		Cy3-SA, 1.5µg/ml	Jackson Immunoresearch 016-160-0848
	Human RANTES (CCL5)	300-06-5 Peprotech	10, 3.3, 1.3		Biotinylated Rabbit Anti-Rantes (CCL5)	500-P36BT Peprotech		Cy3-SA, 1.5µg/ml	Jackson Immunoresearch 016-160-0848
	Human MEC (CCL28)	300-57-5 Peprotech	10, 3.3, 1.3		Biotinylated Anti-Human MEC	500-P297Bt-25		Cy3-SA, 1.5µg/ml	Jackson Immunoresearch 016-160-0848
	Human Exodus-2 (CCL21)	300-35 Peprotech	10, 3.3, 1.3		Biotinylated-Rabbit αHuman Exodus-2 (CCL21)	500-P109BT Peprotech		Cy3-SA, 1.5µg/ml	Jackson Immunoresearch 016-160-0848
	Human BCA-1 (CXCL13)	300-47-5 Peprotech	3.7, 1.2, 0.49		Rabbit Biotinylated Anti-Human BCA-1	500-P141BT-25		Cy3-SA, 0.1µg/ml	Jackson Immunoresearch 016-160-0848
